# Supplementary material for: IntroSpect: Motif-Guided Immunopeptidome Database Building Tool to Improve the Sensitivity of HLA I Binding Peptide Identification by Mass Spectrometry
Source: MDPI journal article supplement (doi:10.3390/biom12040579), 2022-04-14
Supplement: s1 [file s1]

# IntroSpect: motif-guided immunopeptidome database building tool to improve the sensitivity of HLA I binding peptide identification by mass spectrometry

## Supplementary material lists

Supplementary Figure S1. IntroSpect decreases the database size and increases the proportion of identified MS/MS spectra with Comet.

Supplementary Figure S2. Peptides identified by IntroSpect, SpectMHC and the conventional search with MaxQuant.

Supplementary Figure S3. The q-value distribution of conventional search and IntroSpect search.

Supplementary Figure S4. The score distribution of conventional search and IntroSpect search.

Supplementary Figure S5. The histogram of predicted BA rank values of peptides identified by the conventional and In-troSpect search with MS-GF+ on more datasets.

Supplementary Figure S6. The histogram of predicted BA rank values of peptides identified by the conventional and In-troSpect search with Comet.

Supplementary Figure S7. Amino acid frequencies at each position of the peptides identified by the conventional and IntroSpect search with MS-GF+.

Supplementary Figure S8. Amino acid frequencies at each position of the peptides identified by the conventional and IntroSpect search with Comet.

Supplementary Figure S9. The sequence logo comparison of immunopeptides in various datasets by conventional search, IntroSpect search and from IEDB.

Supplementary Figure S10. The comparison of PCCaaf at each position between IntroSpect and SpectMHC.

Supplementary Figure S11. Spectra of neoepitope candidates.

Supplementary Figure S12. Peptides identified by IntroSpect, SpectMHC and the conventional search with PEAKS.

Supplementary Figure S13. Neoepitopes identified by IntroSpect, SpectMHC and the conventional search in the HCT116 dataset.

Supplementary Table S1. Randomly selected peptides identified by IntroSpect and conventional database search with Comet and MaxQuant were confirmed by spectral validation.

Supplementary Table S2. The neoepitope candidates identified from HCT116 cell line.

Supplementary Table S3. The effect of clustering number on the performance of IntroSpect.

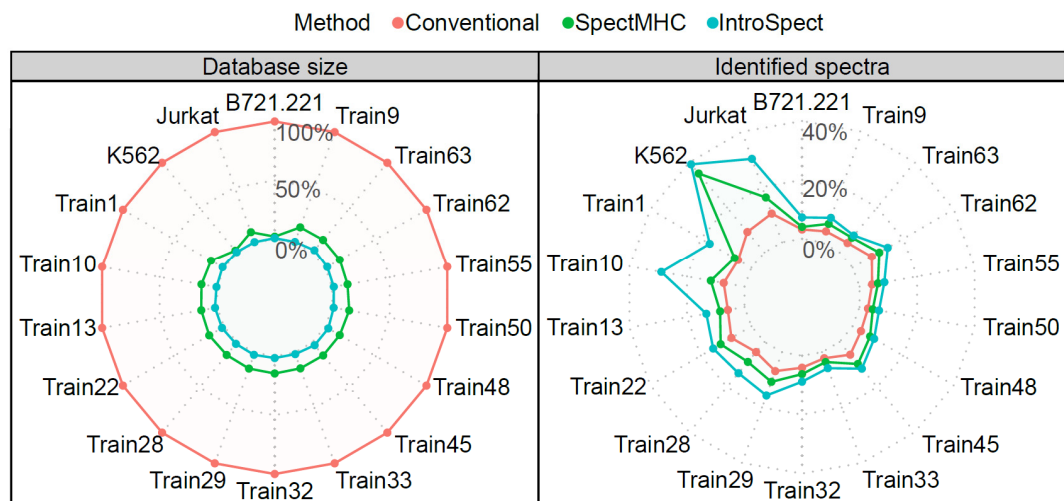

**Supplementary Figure S1.** IntroSpect decreases the database size and increases the proportion of identified MS/MS spectra with Comet.

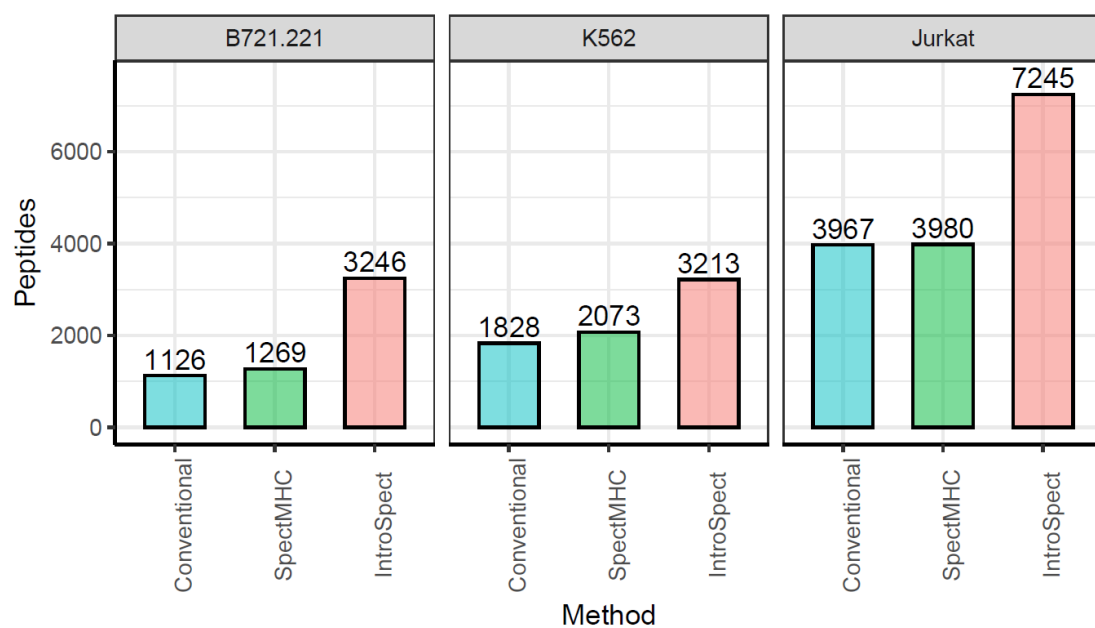

**Supplementary Figure S2.** Peptides identified by IntroSpect, SpectMHC and the conventional search with MaxQuant.

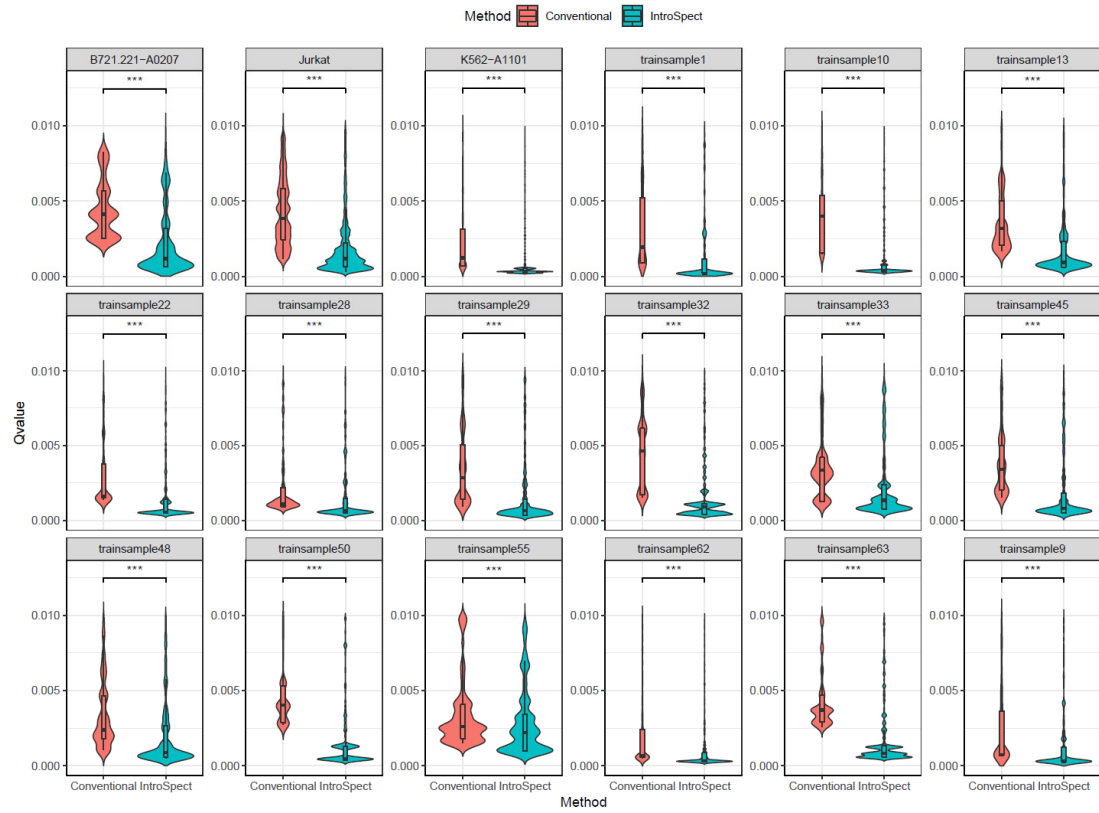

**Supplementary Figure S3.** The q-value distribution of the conventional search and IntroSpect search with MS-GF+.

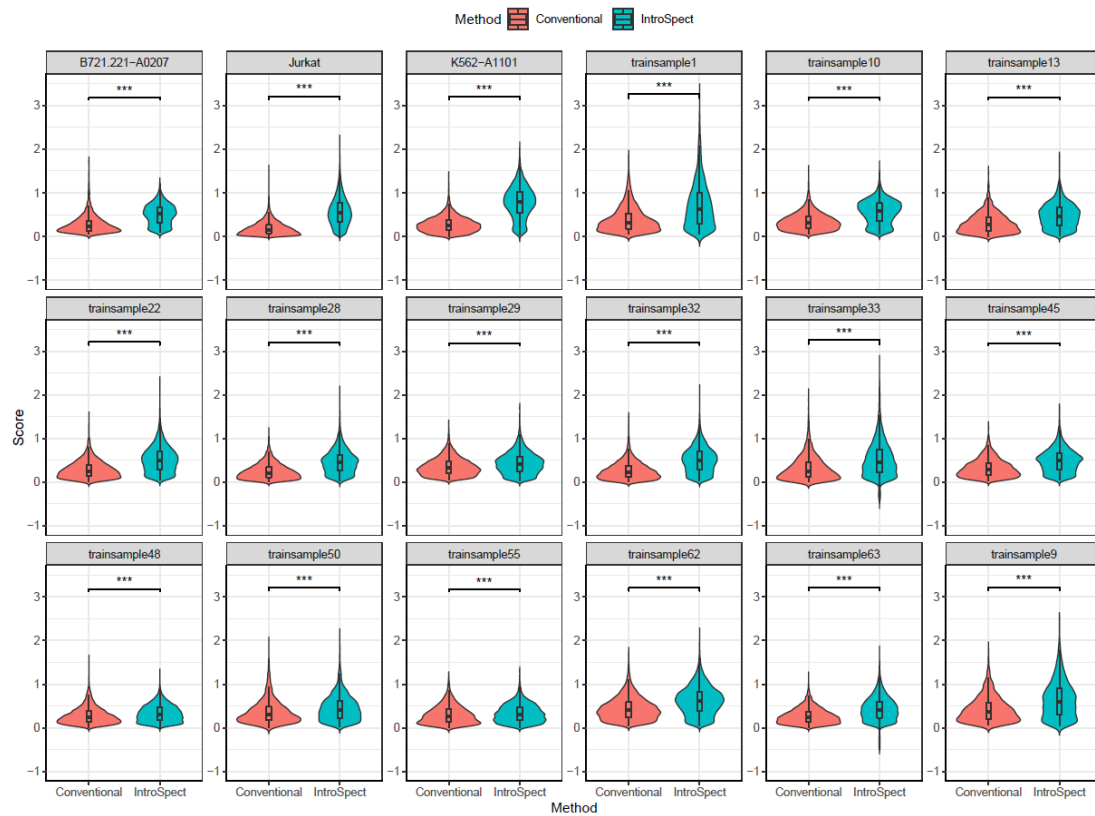

**Supplementary Figure S4.** The score distribution of the conventional search and IntroSpect search with MS-GF+.

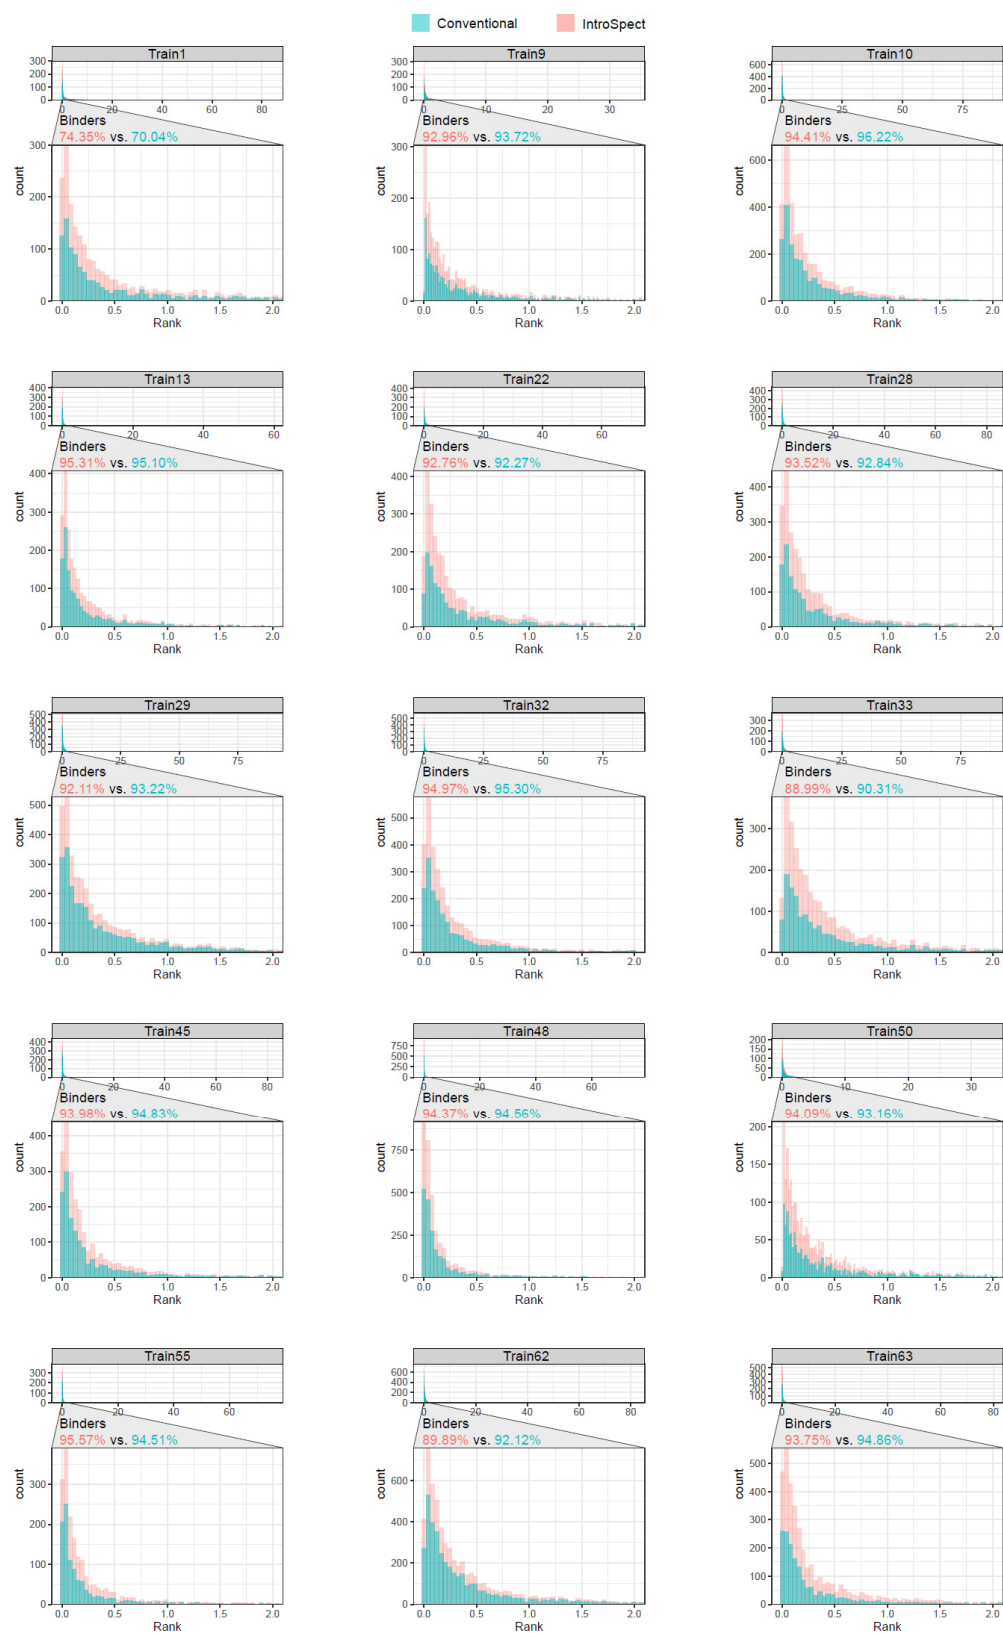

**Supplementary Figure S5.** The histogram of predicted BA rank values of peptides identified by the conventional and IntroSpect search with MS-GF+.

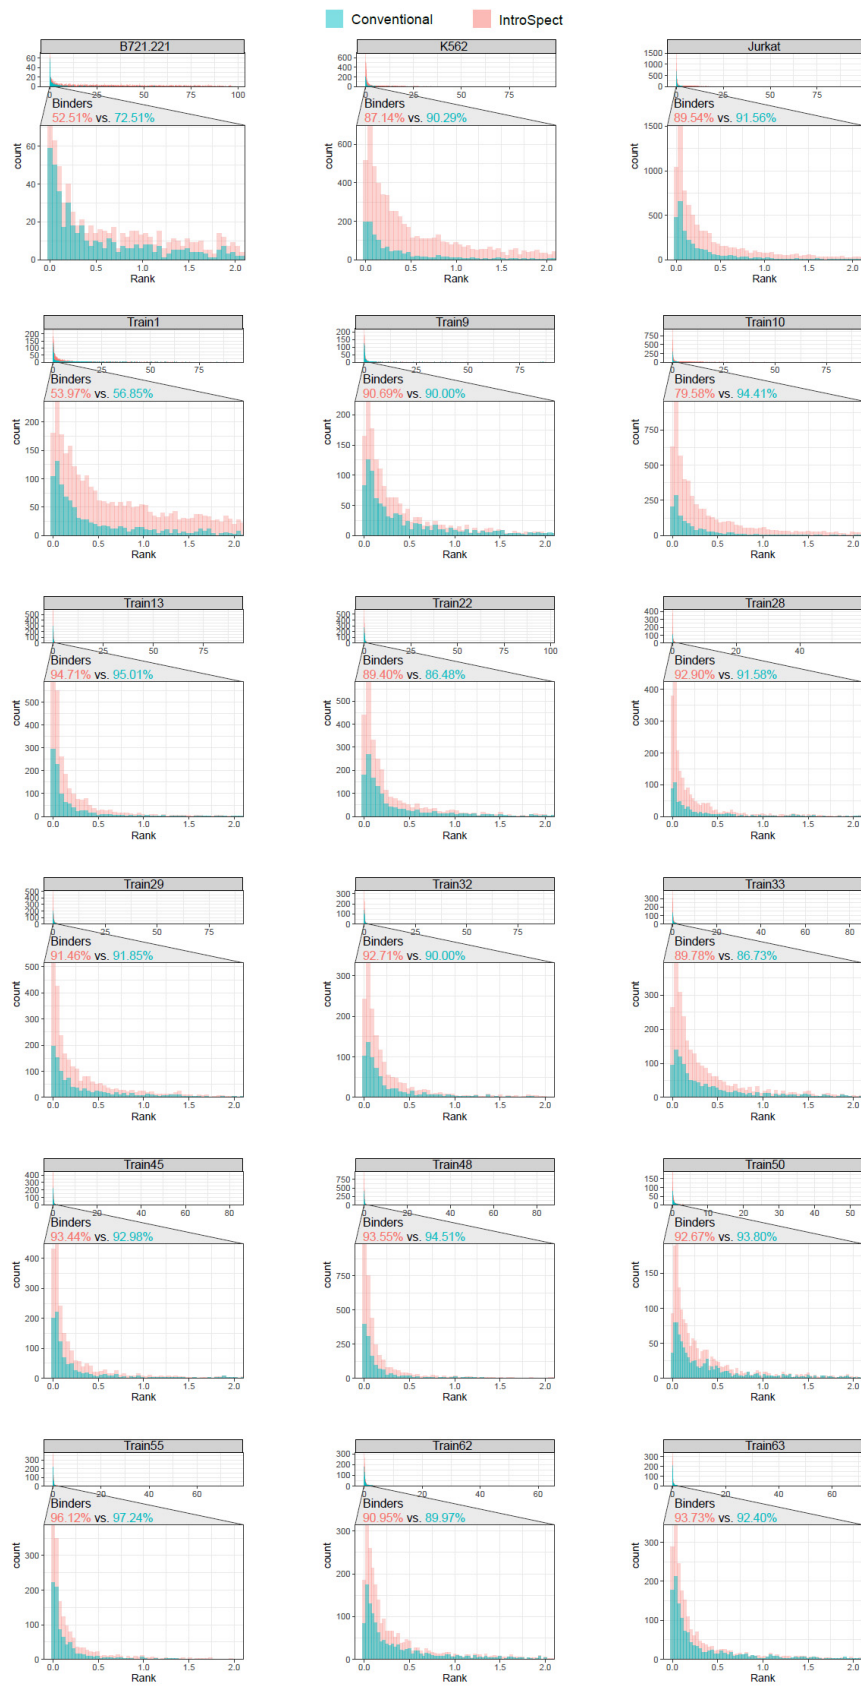

**Supplementary Figure S6.** The histogram of predicted BA rank values of peptides identified by the conventional and IntroSpect search with Comet.

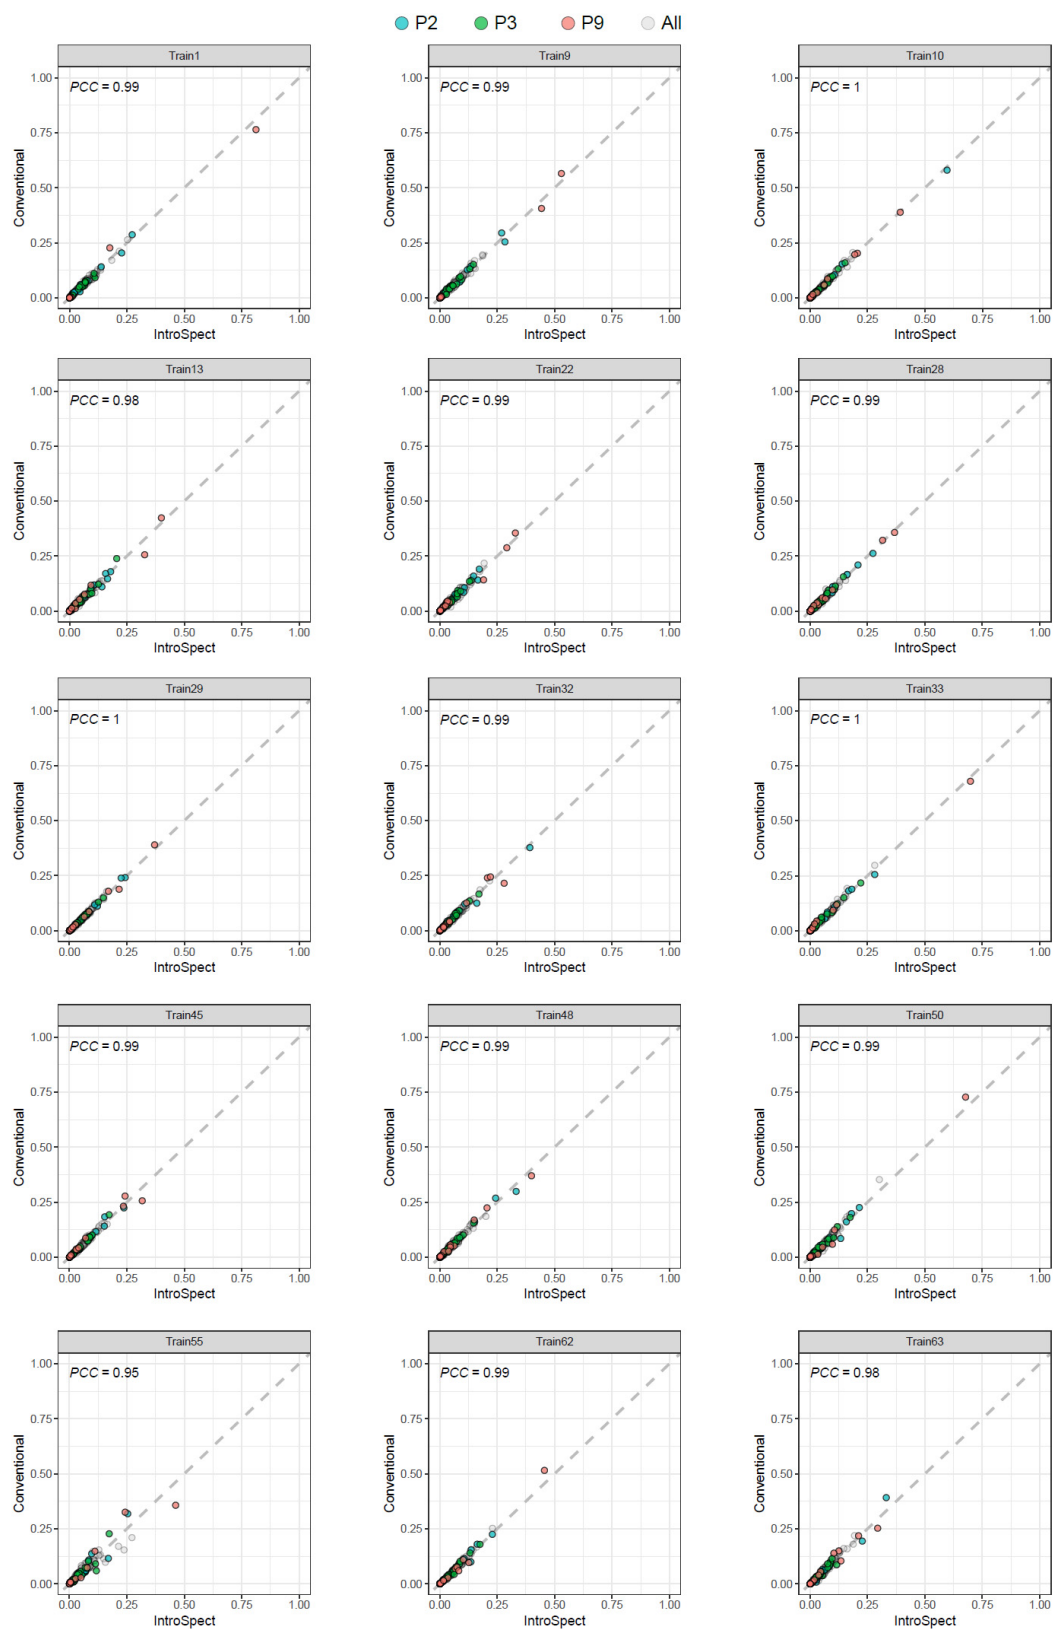

**Supplementary Figure S7.** Amino acid frequencies of each position within peptides identified by the conventional and IntroSpect search with MS-GF+.



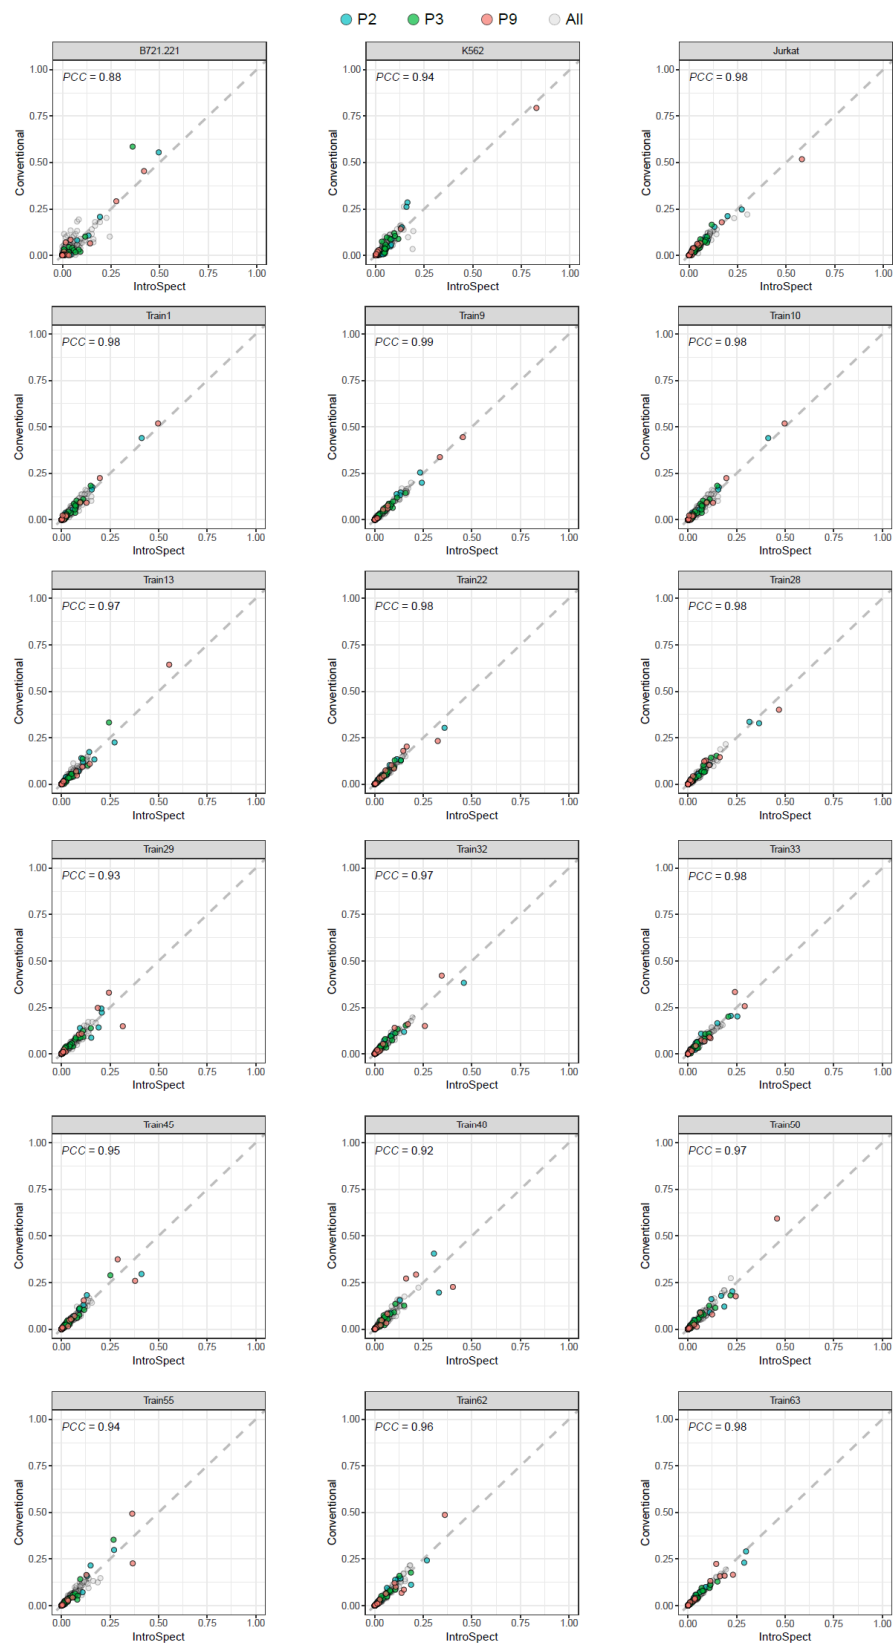

**Supplementary Figure S8.** Amino acid frequencies of each position within peptides identified by the conventional and IntroSpect search with Comet.

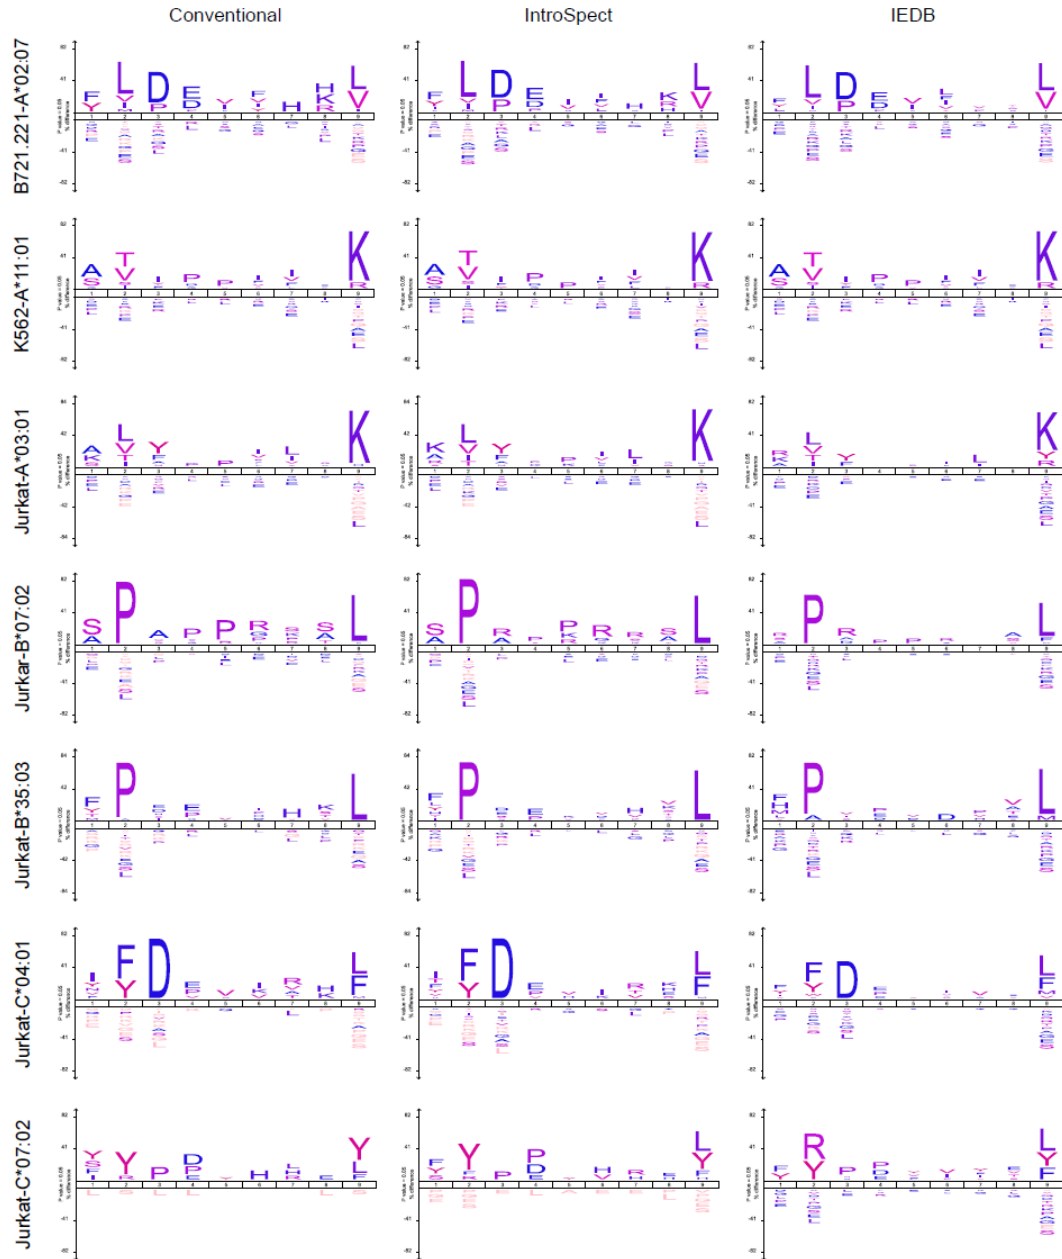

**Supplementary Figure S9.** The sequence logo comparison of immunopeptides in various datasets by the conventional search, IntroSpect search and IEDB published.

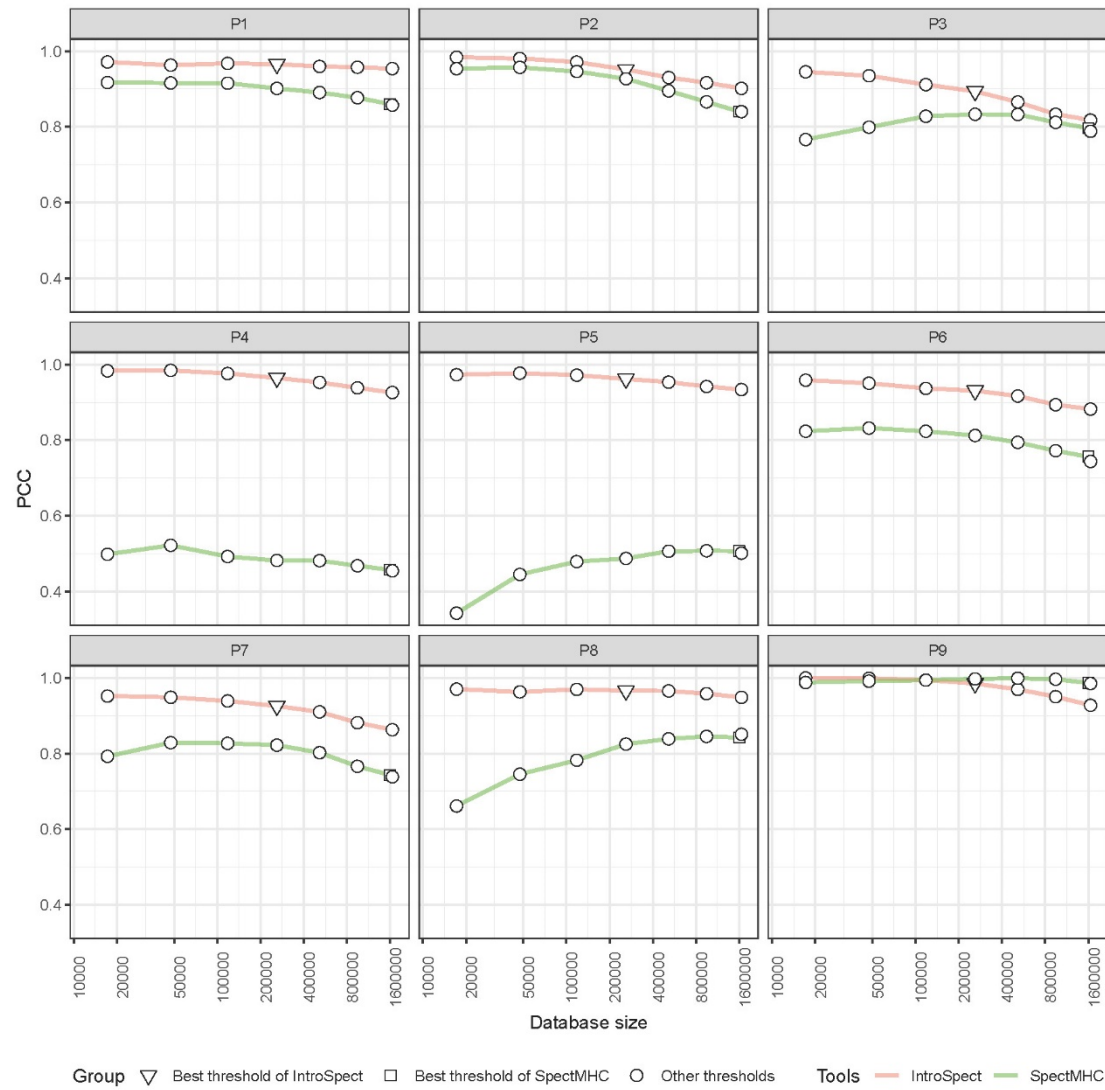

**Supplementary Figure S10.** The comparison of  $PCC_{aaf}$  on each position between the IntroSpect and SpectMHC.



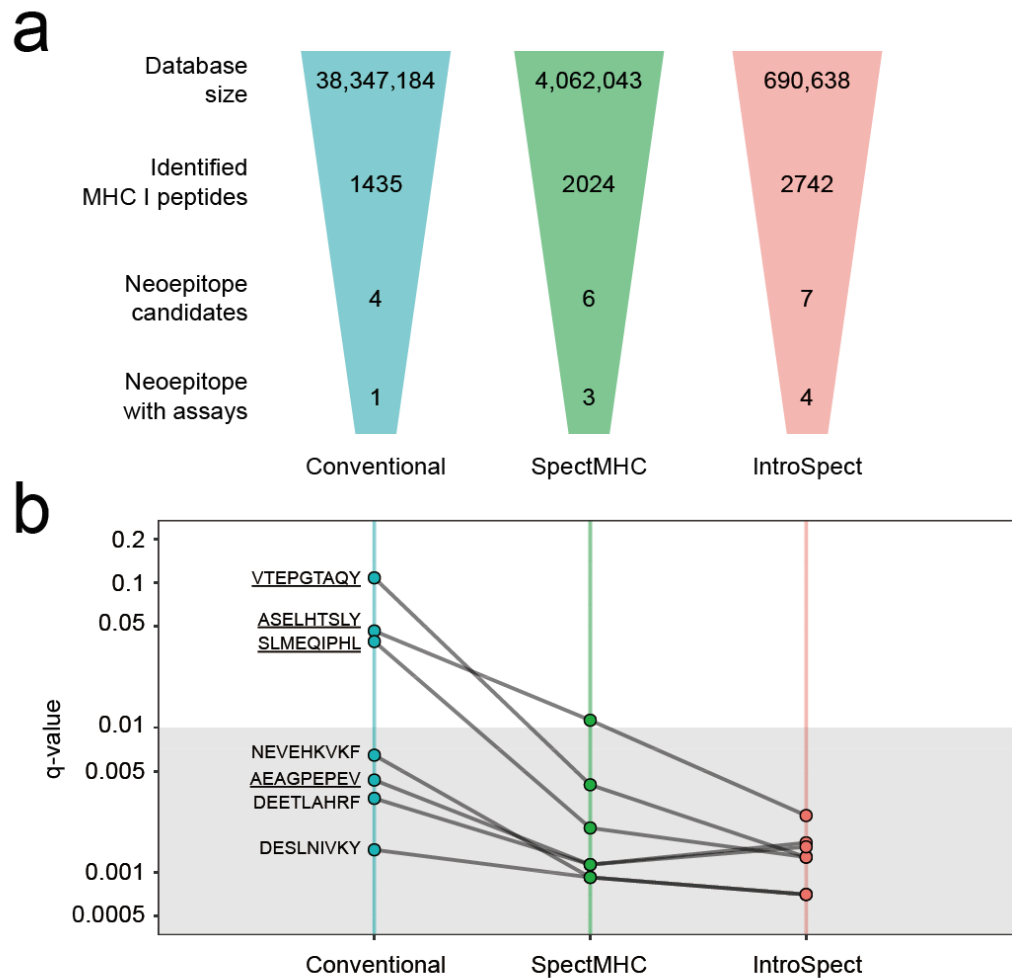

**Supplementary Figure S13.** Neopeptides identified by IntroSpect, SpectMHC and the conventional search in the HCT116 dataset. (a) Flowcharts indicating key steps involved in neopeptide discovery. (b) Percolator q-values of neopeptides identified by all methods are plotted. Underlined peptides have support in other studies.

**Supplementary Table S1.** Randomly selected peptides identified by IntroSpect and conventional database search with Comet and MaxQuant were confirmed by spectral validation.

| Software | Source                           | Identified | Selected for Synthesis | Confirmed positive | Precision (%) |
|----------|----------------------------------|------------|------------------------|--------------------|---------------|
| Comet    | Both conventional and IntroSpect | 1,360      | 45                     | 44                 | 97.78         |
|          | IntroSpect only                  | 6,548      | 43                     | 42                 | 97.67         |
| MaxQuant | Both conventional and IntroSpect | 1,828      | 69                     | 69                 | 100           |
|          | IntroSpect only                  | 1,389      | 55                     | 54                 | 98.18         |

**Supplementary Table S2.** The neoepitope candidates identified from HCT116 cell line.

| ID    | Peptide     | Gene    | Mutation | Site     | Expression (TPM) | HLA     | Predicted IC50 (nM) | Supporting Evidence                                               |
|-------|-------------|---------|----------|----------|------------------|---------|---------------------|-------------------------------------------------------------------|
| Neo-1 | AEAGPEPEV   | EIF3B   | SNV      | p.S64P   | 58.78            | B*45:01 | 279.57              | ligand presentation                                               |
| Neo-2 | VTEPGTAQY   | AKAP13  | SNV      | p.M452T  | 11.61            | A*01:01 | 24.87               | IFN $\gamma$ release                                              |
| Neo-3 | ASELHTSLY   | MDN1    | SNV      | p.H3423Y | 14.65            | A*01:01 | 9.43                | ligand presentation                                               |
| Neo-4 | SLMEQIPHL   | CKAP2   | INDEL    | p.K603X  | 18.67            | A*02:01 | 3.59                | qualitative binding;<br>ligand presentation; IFN $\gamma$ release |
| Neo-5 | DESLNIVKY   | CCZ1B   | SNV      | p.E71D   | 15.66            | B*18:01 | 15.83               |                                                                   |
| Neo-6 | DEETLAHRF   | CWF19L1 | SNV      | p.R523H  | 10.90            | B*18:01 | 39.72               |                                                                   |
| Neo-7 | NEVEHKVKF   | SYNE2   | SNV      | p.I2942V | 11.92            | B*18:01 | 25.22               |                                                                   |
| Neo-8 | QTDQMVFNNTY | CHMP7   | SNV      | p.A324T  | 12.87            | A*01:01 | 15.85               | ligand presentation                                               |

**Supplementary Table S3.** The effect of clustering number on the performance of IntroSpect.

| Sample        | Clustering number | Peptides | Target database size | Predicted binders | Highest KLD in GibbsCluster | Highest sensitivity of identification |
|---------------|-------------------|----------|----------------------|-------------------|-----------------------------|---------------------------------------|
| trainsample10 | 1                 | 3,851    | 223,137              | 96.22%            | yes                         | yes                                   |
|               | 2                 | 3,682    | 508,793              | 94.89%            |                             |                                       |
|               | 3                 | 3,686    | 749,515              | 94.57%            |                             |                                       |
|               | 4                 | 3,631    | 1,039,755            | 94.19%            |                             |                                       |
|               | 5                 | 3,579    | 1,188,375            | 94.33%            |                             |                                       |
|               | 6                 | 3,442    | 1,463,459            | 94.36%            |                             |                                       |
| trainsample1  | 1                 | 2,734    | 313,314              | 74.35%            | yes                         | yes                                   |
|               | 2                 | 2,862    | 600,118              | 72.42%            |                             |                                       |
|               | 3                 | 2,897    | 849,654              | 72.19%            |                             |                                       |
|               | 4                 | 2,978    | 1,105,316            | 71.67%            |                             |                                       |
|               | 5                 | 2,952    | 1,439,230            | 72.89%            |                             |                                       |
|               | 6                 | 2,933    | 1,729,313            | 73.33%            |                             |                                       |
| trainsample13 | 1                 | 2,252    | 315,429              | 95.25%            | yes                         | yes                                   |
|               | 2                 | 2,457    | 476,518              | 95.31%            |                             |                                       |
|               | 3                 | 2,449    | 731,325              | 95.18%            |                             |                                       |
|               | 4                 | 2,412    | 821,779              | 94.90%            |                             |                                       |
|               | 5                 | 2,424    | 919,252              | 96.74%            |                             |                                       |
|               | 6                 | 2,403    | 1,243,004            | 95.05%            |                             |                                       |
| trainsample22 | 1                 | 2,892    | 312,793              | 92.22%            | yes                         | yes                                   |
|               | 2                 | 3,110    | 625,447              | 92.76%            |                             |                                       |
|               | 3                 | 3,214    | 874,518              | 92.59%            |                             |                                       |
|               | 4                 | 3,258    | 1,117,899            | 92.88%            |                             |                                       |
|               | 5                 | 3,371    | 1,202,371            | 92.91%            |                             |                                       |
|               | 6                 | 3,385    | 1,301,864            | 92.82%            |                             |                                       |
| trainsample28 | 1                 | 2,520    | 370,835              | 92.98%            | yes                         | yes                                   |
|               | 2                 | 2,856    | 558,709              | 93.52%            |                             |                                       |
|               | 3                 | 2,802    | 783,273              | 93.79%            |                             |                                       |

|                |   |       |           |        |     |     |
|----------------|---|-------|-----------|--------|-----|-----|
|                | 4 | 2,772 | 1,033,559 | 93.76% |     |     |
|                | 5 | 2,839 | 1,289,132 | 93.48% |     |     |
|                | 6 | 2,840 | 1,363,366 | 94.19% |     |     |
| train-sample29 | 1 | 3,937 | 331,612   | 92.20% |     |     |
|                | 2 | 4,054 | 466,774   | 91.98% |     |     |
|                | 3 | 4,069 | 762,425   | 92.11% | yes | yes |
|                | 4 | 4,008 | 937,662   | 91.99% |     |     |
|                | 5 | 4,007 | 1,137,703 | 91.61% |     |     |
|                | 6 | 4,010 | 1,232,852 | 91.70% |     |     |
| train-sample32 | 1 | 2,925 | 351,422   | 93.91% |     |     |
|                | 2 | 3,397 | 517,652   | 94.32% |     |     |
|                | 3 | 3,423 | 936,824   | 94.97% | yes | yes |
|                | 4 | 3,393 | 1,232,594 | 94.75% |     |     |
|                | 5 | 3,283 | 1,504,020 | 94.73% |     |     |
|                | 6 | 3,313 | 1,593,733 | 94.63% |     |     |
| train-sample33 | 1 | 3,279 | 216,554   | 88.99% | yes | yes |
|                | 2 | 3,234 | 531,904   | 89.33% |     |     |
|                | 3 | 3,229 | 740,573   | 90.31% |     |     |
|                | 4 | 3,184 | 922,064   | 90.33% |     |     |
|                | 5 | 2,909 | 1,036,538 | 90.13% |     |     |
|                | 6 | 2,762 | 1,581,585 | 89.36% |     |     |
| train-sample45 | 1 | 2,395 | 389,605   | 93.86% |     |     |
|                | 2 | 2,622 | 644,495   | 94.13% |     |     |
|                | 3 | 2,656 | 884,236   | 94.62% |     |     |
|                | 4 | 2,677 | 1,068,221 | 93.98% | yes | yes |
|                | 5 | 2,669 | 1,196,005 | 94.87% |     |     |
|                | 6 | 2,654 | 1,166,620 | 94.05% |     |     |
| train-sample48 | 1 | 3,991 | 381,131   | 94.61% |     |     |
|                | 2 | 4,050 | 681,386   | 94.37% |     | yes |
|                | 3 | 3,791 | 861,730   | 95.23% |     |     |



|               |   |       |           |        |     |     |
|---------------|---|-------|-----------|--------|-----|-----|
|               | 4 | 3,913 | 1,098,827 | 94.07% | yes |     |
|               | 5 | 3,820 | 1,485,346 | 94.19% |     |     |
|               | 6 | 3,763 | 1,932,503 | 93.62% |     |     |
| trainSample50 | 1 | 2,757 | 246,051   | 91.88% |     |     |
|               | 2 | 2,759 | 493,886   | 94.09% | yes | yes |
|               | 3 | 2,627 | 708,238   | 93.76% |     |     |
|               | 4 | 2,610 | 1,088,199 | 92.45% |     |     |
|               | 5 | 2,553 | 1,438,081 | 92.60% |     |     |
|               | 6 | 2,550 | 1,213,857 | 92.55% |     |     |
| trainSample55 | 1 | 1,894 | 258,605   | 94.61% |     |     |
|               | 2 | 1,912 | 485,858   | 95.45% |     |     |
|               | 3 | 1,987 | 508,586   | 95.57% | yes |     |
|               | 4 | 2,009 | 506,461   | 95.57% |     | yes |
|               | 5 | 1,933 | 508,238   | 95.81% |     |     |
|               | 6 | 1,884 | 577,765   | 95.38% |     |     |
| trainSample62 | 1 | 6,476 | 293,167   | 84.96% |     | yes |
|               | 2 | 6,368 | 459,030   | 88.85% |     |     |
|               | 3 | 6,174 | 679,822   | 89.89% | yes |     |
|               | 4 | 6,198 | 883,886   | 89.72% |     |     |
|               | 5 | 6,217 | 1,062,362 | 89.56% |     |     |
|               | 6 | 6,112 | 1,346,370 | 89.59% |     |     |
| trainSample63 | 1 | 3,278 | 322,154   | 92.98% |     |     |
|               | 2 | 3,742 | 507,679   | 93.69% |     |     |
|               | 3 | 3,922 | 738,594   | 93.75% | yes |     |
|               | 4 | 4,041 | 910,363   | 93.07% |     |     |
|               | 5 | 4,042 | 1,019,680 | 93.15% |     | yes |
|               | 6 | 3,805 | 1,393,341 | 93.04% |     |     |
| trainSample9  | 1 | 3,170 | 247,568   | 92.95% | yes | yes |
|               | 2 | 3,066 | 428,924   | 93.44% |     |     |
|               | 3 | 2,851 | 755,969   | 92.84% |     |     |

|   |       |           |        |
|---|-------|-----------|--------|
| 4 | 2,836 | 1,065,080 | 93.16% |
| 5 | 2,667 | 1,317,339 | 92.80% |
| 6 | 2,597 | 1,458,010 | 93.11% |

---
